# Supplementary material for: Haptic feedback in violin education as a case study of robotic exoskeleton-mediated motor learning
Source: Sci Rep. 2026 Mar 4;16:13639. doi: 10.1038/s41598-026-39226-8 (PMC13125633; doi:10.1038/s41598-026-39226-8)
Supplement: Supplementary file 1 — Supplementary Material 1 [file 41598_2026_39226_MOESM1_ESM.xlsx]

## Sheet: Formulierreacties 1
Tijdstempel	What is your participant number	What is your age in years?	What is your weight?	What is your body length?	What is your gender?	Do you feel fatigue?	I find the exoskeleton cumbersome to use	Learning to operate the exoskeleton is easy for me.	Interacting with the exoskeleton is often frustrating.	I find it easy to get the exoskeleton to do what I want it to do.	The exoskeleton is rigid and inflexible to interact with.	It is easy for me to remember how to perform tasks using the exoskeleton.	Interacting with the exoskeleton requires a lot of mental effort.	My interaction with the exoskeleton is clear and understandable.	I find it takes a lot of effort to become skillful at using exoskeleton.	Overall, I find the exoskeleton easy and simple to use.	Using the exoskeleton increases my interest in learning and practice.	Using the exoskeleton improves my performance.	Using the exoskeleton allows me to gain more knowledge and exposure towards different styles of music, than would otherwise be impossible.	Using the exoskeleton enhances my expertise in a particular component of the instrumental training.	Using the exoskeleton makes it easier to learn to play an instrument at one’s own pace and comfort.	Overall, I find the exoskeleton useful for instrumental training.	The feedback mechanism is accurate.	I would have fun using the exoskeleton.	Using the exoskeleton is pleasurable.	It is uncertain that the exoskeleton will work satisfactorily.	I worry about whether the exoskeleton will not provide the level of benefits I expect.	It is uncertain that the exoskeleton will perform the functions that were described by researchers.	Using the exoskeleton makes me feel uncomfortable due to potential data security issues.	I won’t use an exoskeleton, because I am concerned being observed.	I am afraid of my performance data being tracked by the exoskeleton.	I was able to learn about robotics thanks to the exoskeleton.	Using the system enhances my motivation to prepare my lessons/teach.	I was able to understand the working of the system without any prior knowledge about robotics.	Assuming I have access to the exoskeleton, I intend to use it.	I predict that I would use the exoskeleton in my future learning.	I felt free to move while using the device.	I felt that I could not move as quickly as I wanted.	I immediately felt comfortable with the device.	I think the device could be useful for a instrumental training session.	Describe the impediments (if any) perceived during the execution of the movements.	Describe your personal opinion about the exoskeleton. Which aspects did you like best?	Describe your personal opinion about the exoskeleton. Which aspects did you not like?	Do you have any further questions, comments, or suggestions regarding the comfort, usability, or utility of the exoskeleton device?	I spend a lot of my free time doing music-related activities.	I enjoy writing about music, for example on blogs and forums.	I often read or search the internet for things related to music.	Music is kind of an addiction for me - I couldn't live without it.	I am able to identify what is special about a given musical piece.
2023-09-18 11:38:19	P01	38	82	185	Male	no	4	4	2	4	2	4	1	4	2	4	5	3	3	4	2	4	4	5	4	3	4	3	1	1	1	4	4	4	4	4	3	4	4	4	lifting arms sideways, from arms next to the body to T-pose, sometimes made the a 'click' sound.	Once it is on it is easy to 'get' the feedback info without further instructions.	Putting it on takes a while and makes you feel less free in your movement. Even if it is not the case the weight, straps make it feel that way. The feedback does work well for larger movements. Being tethered also adds to that feeling.	During the sessions there is no interaction or room for pause. If you have troubles finding the right position for the violin (from T-pose to violin playing) it does not wait and continues and provides feedback while you might not be ready.	6	5	6	6	5
2023-09-18 16:06:40	P02	63	80	192	Male	yes	1	5	1	5	1	5	1	3	1	5	5	4	3	5	5	5	3	5	5	3	3	2	1	1	1	5	5	3	5	4	5	1	5	5	Actually it was doing all the movements required for the job, so after a short while I got used to it, and found it almost a pity had to take it off	it was fun when it was pushing my arms up for the T position	the strapping in, that it took so long, but that will probably change in the future	I was looking at the design and in the box, can we make a DIY open source kit?	7	7	7	4	7
2023-09-19 12:19:45	P03	39	80	197	Male	no	2	1	1	4	1	5	1	4	1	5	4	4	5	5	4	5	4	5	4	3	3	2	1	1	1	1	3	5	4	3	3	3	4	4	No	The correction or adequacy to the movement	In my opinion, it felt somewhat bulky and not comfortable to wear, even visually.	No	4	1	6	5	6
2023-09-19 16:25:57	P04	35	64	184	Male	no	2	5	1	4	1	4	1	4	2	4	3	3	2	4	4	4	4	5	4	3	3	2	1	1	1	3	3	3	4	3	4	1	4	4	I was not able to bend the trunk or move freely with the trunk	The force helping to follow the bowing movement	It constrains a bit the right arm	No other comments	1	1	1	3	3
2023-09-19 17:21:14	P05	28	67	169	Male	no	2	5	2	4	2	3	2	5	1	5	4	5	3	5	5	5	4	5	4	2	2	1	1	1	1	3	5	5	5	5	5	2	5	5	/	I like the exoskeleton. I think it will help me the best in getting the right rhythm since I often find it difficult to get the right timing.	Not anything in particular.	I think I'll find it very helpful to see (on screen maybe) which movements I did wrong or weren't completely correct so I can practice on the details as well.	6	3	6	7	5
2023-09-20 10:04:00	P06	40	85	185	Male	yes	3	3	1	5	2	3	4	4	4	4	5	2	4	3	2	2	3	4	2	4	5	3	1	1	1	4	4	5	4	4	2	2	2	4	Having to stand still. I have lower back pains (from long before the experiment). Standing still for a long time hurts a bit.	It feels a bit silly (in a fun way). You have the idea that you are being taken seriously. I like playing with new technological tools. It was something new.	Standing still. Being watched by a number of people, who all hear my very first lessons (during which I obviously suck at playing the violin). The whole setup process is long.	No	4	2	7	6	3
2023-09-20 12:52:26	P07	42	71	181	Male	no	2	4	1	4	2	3	1	4	2	4	4	4	3	4	3	3	3	4	4	4	3	3	1	1	1	5	4	5	4	3	3	2	4	4	The moving to T position via arms facing forward is an extra thing to keep in mind. Mildly impeding though.	First of all : Exoskeleton! What's not to like about technology from all the SciFi books I read. Second of all, once activated it felt very natural to move with.	Really cool potential, although in the way I experienced it, I wasn't feeling "directed" all that much. Maybe because I was acting on my own too much and didn't run into the boundaries it might have set otherwise? Or maybe I didn't feel it all that much because the tandem of my own movements and its movements were so well tuned that I didn't register it helping? What if I would have just followed…	Love the potential. Curious to see future iterations. Looking forward to setups that also support hand movement or even positioning of the violin.	2	1	3	4	2
2023-09-20 23:17:35	P08	25	82	185	Male	no	3	4	2	4	4	4	1	5	2	4	3	3	3	4	2	4	3	3	2	3	4	2	2	2	2	2	2	2	2	2	2	3	2	3	I was holding back because i didnt want to break anything. Also the fact that you couldn't move your arm Sideways was An impediment.	It definitly helpen with getting te movement right and gave some more guidance next to the visual part.	It's a lot of work. In my opinion music works best when moving fast and having a quick result. To me, this felt more like an obstruction if I'd want to learn how to play the violin.	No.	6	3	6	7	7
2023-09-21 10:21:28	P09	40	75	183	Male	no	2	4	1	4	3	5	1	4	1	5	3	5	4	5	5	5	4	4	4	3	4	3	1	2	2	5	4	3	1	1	4	3	2	4	i think the support could be more direct, more supportive.	it gave me a good understanding of playing the violin	it weighs a lot on my shoulder	nope	5	1	2	5	5
2023-09-21 18:48:58	P10	22	73	175	Male	no	3	4	2	4	3	4	1	4	2	4	3	3	3	3	3	3	4	4	3	3	4	2	1	1	2	2	3	4	3	2	2	4	3	4	There was some resistance when bringing my arm back behind my body. This was felt when doing the T-pose	It was not too heavy, and the counterbalance mechanism used to make it feel weightless was also very cool. Like I said above I did experience some restriction of movement, but that's possibly due to a mistake during the alignment instead of a problem with the exoskeleton itseld.	.	I think it would be better if, after the lesson with the exoskeleton, you let the participants play the violin without the exoskeleton itself.	3	1	2	5	3
2023-09-21 15:14:30	P11	50	95	178	Male	no	2	4	1	5	1	4	1	4	1	5	5	3	3	4	4	4	3	5	5	3	1	1	1	1	1	5	4	5	3	3	3	2	4	5	The cables limit your mobility	Fun to participate in innovation	Nothing	Good luck	7	4	7	7	6
2023-09-22 21:09:25	P12	23	75	183	Male	no	2	4	1	4	2	5	1	5	2	4	4	2	3	4	4	4	2	5	5	3	4	2	1	1	1	4	4	4	4	4	3	4	4	4	I didn't have as much range of motion as I usually have.	It seems fun and maybe engages you a bit more in the learning experience. Also, the exoskeleton 'forcing' certain movements on you might be beneficial when you're not paying enough attention.	I think the novelty and fun aspect of it might wear off quickly due to the fact that it requires a lot of setup. Also, the limitation of your range of motion might be problematic when doing bigger and faster movements.	/	1	1	3	4	2
2023-09-22 15:34:16	P13	27	85	187	Male	no	2	4	1	5	2	3	2	4	1	4	3	4	4	3	3	4	2	5	4	4	2	2	1	1	1	4	4	4	2	2	4	4	4	4	/	The fact that is sometimes corrected my pose, most noticeable with the speed of the stroke and the position of the arm when playing the A string.	The difficulty of putting it on	/	6	3	6	7	3
[truncated: 43 more columns]

## Sheet: Sheet1
Participant	age	weight	length	MSI
P01	38	82	185	4.42857
P02	63	80	192	5.35714
P03	39	80	197	4.85714
P04	35	64	184	3.14286
P05	28	67	169	4.42857
P06	40	85	185	4.25
P07	42	71	181	3.32143
P08	25	82	185	4.21429
P09	40	75	183	4.07143
P10	22	73	175	3.25
P11	50	95	178	4.75
P12	23	75	183	2.89286
P13	27	85	187	3.75
	36.3077	78	183.385	4.05495
	11.6789	8.34666	7.03015	0.743111
