# Supplementary material for: Haptic feedback in violin education as a case study of robotic exoskeleton-mediated motor learning
Source: Sci Rep. 2026 Mar 4;16:13639. doi: 10.1038/s41598-026-39226-8 (PMC13125633; doi:10.1038/s41598-026-39226-8)
Supplement: Supplementary file 2 — Supplementary Material 2 [file 41598_2026_39226_MOESM2_ESM.xlsx]

## Sheet: Formulierreacties 1
Tijdstempel	What is your participant number	What is your age in years?	What is your weight?	What is your body length?	What is your gender?	I spend a lot of my free time doing music-related activities.	I enjoy writing about music, for example on blogs and forums.	I often read or search the internet for things related to music.	Music is kind of an addiction for me - I couldn't live without it.	I am able to identify what is special about a given musical piece.	I engaged in regular, daily practice of a musical instrument (including voice) for_ years.	At the peak of my interest, I practised my primary instrument for _ hours per day.	I have never been complimented for my talents as a musical performer.	I have had formal training in music theory for _ years.	I have had _ years of formal training on a musical instrument (including voice) during my lifetime.	I can play _ musical instruments.	I would not consider myself a musician.	I am able to judge whether someone is a good singer or not.	I usually know when I'm hearing a song for the first time.	I find it difficult to spot mistakes in a performance of a song even if I know the tune.	I can compare and discuss differences between two performances or versions of the same piece of music.	I have trouble recognizing a familiar song when played in a different way or by a different performer.	I can tell when people sing or play out of time with the beat.	I can tell when people sing or play out of tune.	When I sing, I have no idea whether I'm in tune or not.	If somebody starts singing a song I don't know, I can usually join in.	I can sing or play music from memory.	I am able to hit the right notes when I sing along with a recording.	I am not able to sing in harmony when somebody is singing a familiar tune.	I don't like singing in public because I'm afraid that I would sing wrong notes.	After hearing a new song two or three times, I can usually sing it by myself.	I only need to hear a new tune once and I can sing it back hours later.	Do you have absolute pitch? Absolute or perfect pitch is the ability to recognise and name an isolated musical tone without a reference tone, e.g. being able to say 'F#' if someone plays that note on the piano.	If you engaged in regular, daily practice of a string instrument, for how long did you maintain this?	I have you had formal training on a string instrument during your lifetime, how long did you maintain this?	Do you have a string instrument at home?	When was the last time you played a string instrument before this experiment?	Did you have any prior knowledge about how to hold or play the violin or another string instrument before this experiment? Please, explain.	If you played a string instrument before, how many hours per day did you practice on average?	The lesson's goal was to teach you the fundamental movements required to play the violin. Did you find the lesson useful in this regard? Please, explain	What could be still improved in the lesson structure?	I found Exercise 1 difficult.	I found Exercise 2 difficult.	I found Exercise 3 difficult.	How would you rate your first performance of Exercise 1 (so the performance before the lesson), as compared to the last one (so the performance after the lesson).	How would you rate your first performance of Exercise 2 (so the performance before the lesson), as compared to the last one (so the performance after the lesson).	How would you rate your first performance of Exercise 3 (so the performance before the lesson), as compared to the last one (so the performance after the lesson).	I felt the lesson properly instructed me how to execute Exercise 1.	I felt the lesson properly instructed me how to execute Exercise 2.
2023-10-04 12:00:32	PC01	28	70	175	Male	4	1	6	3	6	4	3	1	3	3	3	6	7	6	2	7	1	6	7	2	5	6	5	2	5	5	2	1	0	0	no	Never	Just out of seeing people playing, and maybe holding it once or twice.	N/A	Yes, I would say it gets through some of the main right hand movements required. Besides, just practicing making a stable sound out of it through the different exercises seems like a relevant practice	I think it may be too focused on visually following the teacher, while actually it seems easier to focus on your own movement and look at your hands and positions while playing. So, if I had to suggest an improvement, would be more verbal cues (i.e. instructions about how to hold it and how it is supposed to feel) and less visual mirroring.	6	3	6	3	2	5	6	4
2023-10-05 10:51:35	PC02	21	70	185	Male	2	1	5	7	6	6	2	2	6	6	2	5	6	6	2	5	2	6	6	3	2	5	4	4	7	4	5	1	0	0	yes	5 years ago	No, I didn't have prior knowledge. I have hold the violin maybe once before.	N/A	Yes, I learned some basic movements so I can play 2 notes on the violin.	A little bit more focus on the holding of the bow and how exactly it should be moved over the strings.	5	4	3	5	5	5	2	2
2023-10-05 15:12:41	PC03	36	72	182	Male	3	1	3	2	3	1	6	3	1	1	5	3	4	3	3	4	3	5	5	3	4	3	4	4	5	4	4	1	4	0	yes	1 year	bass guitar	1.5	yes, but it also added extra stimuli which made it difficult to focus on your own playing	play time (sandbox moments), live feedback AND post-exercise feedback	5	5	5	3	3	3	5	5
2023-10-05 16:52:37	PC05	40	70	180	Male	7	7	7	7	5	6	7	2	6	5	2	2	5	6	2	6	2	7	7	2	4	4	4	3	5	5	2	1	0	0	no	0	Yes, I kind of know through earlier experiences	0	Yes	(1) Change of perspective of the teacher. (2) More room for getting acquiqnted and exploration	6	5	5	5	5	5	2	2
2023-10-05 18:22:04	PC04	38	95	186	Male	2	1	3	4	1	1	1	7	1	1	1	7	1	3	6	1	5	6	2	7	1	1	1	6	6	3	1	1	NA	No	yes	Never	No, no experience at all	0	Yes, the movements were clearly explained and for a first lesson I found it really insightful. In practice, I would ask for more clarification on how to hold the violin and the bow, but as a first experience, this was nice.	The structure was good. There was a build up in difficulty, which is good. I also felt improvement when following the lecture.	4	2	2	5	5	5	2	2
2023-10-06 12:33:55	PC06	29	80.5	185	Male	6	2	7	7	6	7	7	3	7	6	7	1	7	4	2	7	3	6	6	2	1	6	2	2	7	4	2	1	Never	Never	no	Never	Yes because of a YouTube channel. Twoset violin	0	Yes, how to controle your fingers on the bow. The shoulder movement controls the position On the strings. Keeping the violin horizontal.	/	5	4	3	5	5	7	2	1
2023-10-06 15:39:16	PC07	25	61	176	Male	5	1	6	4	4	5	2	5	1	3	2	5	5	7	2	6	1	5	5	3	5	6	6	4	2	6	3	1	4-6 months	1 year	yes	13 y/o	I play the guitar (and recently started to play the mandolin). No practical knowledge about playing the violin.	0.5	I would've liked to have some feedback on my posture, on how I was holding the violin and on my performance in general.	Provide feedback + make sure trainee can hear him-/herself playing better --headphones	2	2	2	6	6	6	3	3
2023-10-06 16:05:54	PC08	30	75	178	Male	4	1	1	1	1	6	2	7	4	6	3	1	3	6	2	6	1	7	2	6	1	1	2	7	7	1	1	1	0	0	no	Never	no	0	yes, it was effective	there was a lot of repetition	5	5	6	6	6	6	2	2
2023-10-06 16:53:19	PC09	31	85	194	Male	2	4	7	6	5	1	1	7	1	1	1	7	4	7	5	5	2	4	4	5	5	5	3	6	2	5	3	1	/	/	no	never	no	N/A	Yes, it did help me to learn the basic movements.	Close-ups and more in-depth description on how to hold the string in particular	5	3	4	3	3	3	2	2
2023-10-09 11:08:45	PC10	53	75	184	Male	3	1	6	6	5	6	4	2	6	6	4	6	6	7	3	6	1	6	6	4	2	5	2	3	7	5	2	1	6 years	6 years	yes	one year ago	I played guitar as a hobby, never played a violin	0.5	Yes, it showed me how difficult it is to play a violin	It would be better for me to have more repetitions	4	4	4	4	4	4	1	1
2023-10-09 11:53:21	PC11	28	84	198	Male	7	2	7	7	7	6	5	1	7	7	4	7	7	7	2	7	1	7	7	2	5	7	7	3	3	6	4	1	4 years (string being guitar)	only formal training on singing and piano	yes	two days (guitar)	tried it one time before (violin), I play guitar often	1.5	yes learned some things on posture and coordination	more details, more repetitions. follow up on a later moment	5	3	6	3	3	2	3	3
2023-10-09 13:11:27	PC12	45	79	185	Male	5	2	6	6	6	7	3	1	1	7	3	7	7	6	2	7	2	6	6	2	2	4	3	5	4	4	2	1	0	0	no	Never played a string instrument before	No. I did use a cello bow to play "with bow" on a vibraphone (as a percussionist)	N/A	Yes, although there was very little to no technical explanation (theory) about the postures and positions (i.e., angles, when is a pose ok and when not ok).	see previous answer: more technical/theoretical explanations (pose, speed, ...)	7	7	6	4	4	4	2	2
[truncated: 3 more columns]

## Sheet: Sheet1
Participant	age	weight	length	MSI
PC01	28	70	175	4
PC02	21	70	185	4.21429
PC03	36	72	182	3.25
PC05	40	70	180	4.57143
PC04	38	95	186	2.89286
PC06	29	80.5	185	4.57143
PC07	25	61	176	3.92857
PC08	30	75	178	3.25
PC09	31	85	194	3.89286
PC10	53	75	184	4.32143
PC11	28	84	198	5.10714
PC12	45	79	185	4.17857
	33.6667	76.375	184	4.01488
	9.08879	8.96743	6.76891	0.634224
